# Supplementary material
Source: publisher site journal article supplement (https://www.dovepress.com/article/590836)
Supplement: Supplementary file 1 [file 590836%20Revised%20Supplementary%20Material.pdf]

Figure S1. Model Structure.

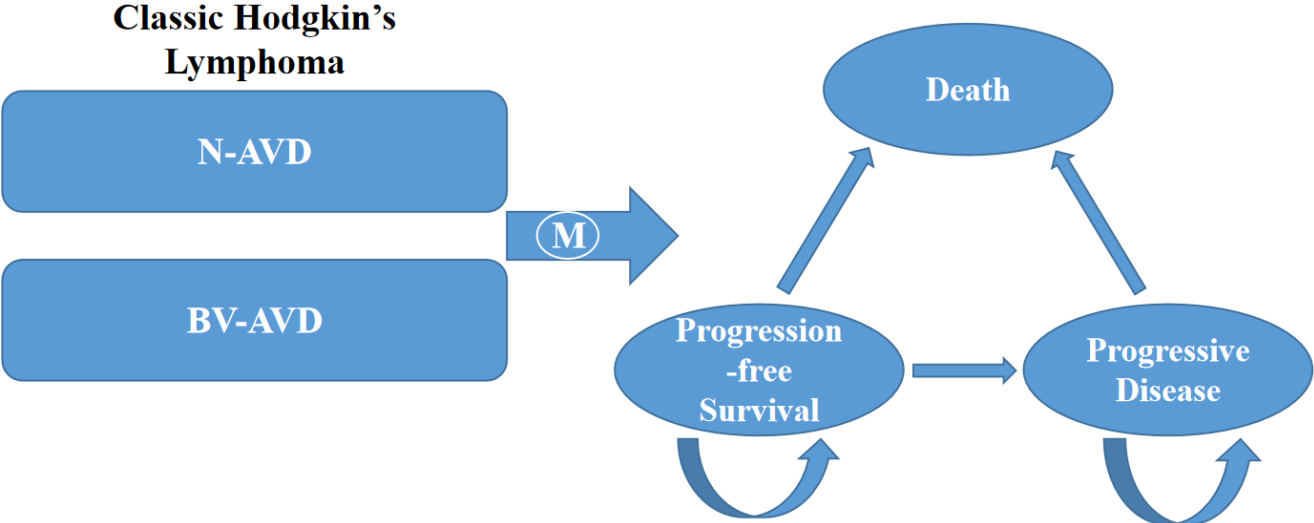

Abbreviation: M, Markov; N, nivolumab; BV, brentuximab vedotin; AVD, doxorubicin/vinblastine/dacarbazine.

**Table S1.** The CHEERS 2022 Checklist.

| <b>Title and abstract</b>                        | <b>Item No</b> | <b>Recommendation</b>                                                                                                                           | <b>Reported</b> |
|--------------------------------------------------|----------------|-------------------------------------------------------------------------------------------------------------------------------------------------|-----------------|
| Title                                            | 1              | Identify the study as an economic evaluation and specify the interventions being compared.                                                      | P1/L1-L3        |
| Abstract                                         | 2              | Provide a structured summary that highlights context, key methods, results, and alternative analyses.                                           | P1-2/L16-L32    |
| <b>Introduction</b>                              |                |                                                                                                                                                 |                 |
| Background and objectives                        | 3              | Give the context for the study, the study question, and its practical relevance for decision making in policy or practice.                      | P2-5/L35-L96    |
| <b>Methods</b>                                   |                |                                                                                                                                                 |                 |
| Health economic analysis plan                    | 4              | Indicate whether a health economic analysis plan was developed and where available.                                                             | P5/L98-114      |
| Study population                                 | 5              | Describe characteristics of the study population (such as age range, demographics, socioeconomic, or clinical characteristics).                 | P6/L112-120     |
| Setting and location                             | 6              | Provide relevant contextual information that may influence findings.                                                                            | P5-6/L101-114   |
| Comparators                                      | 7              | Describe the interventions or strategies being compared and why chosen.                                                                         | P6/L102-114     |
| Perspective                                      | 8              | State the perspective(s) adopted by the study and why chosen.                                                                                   | P7/L143-145     |
| Time horizon                                     | 9              | State the time horizon for the study and why appropriate.                                                                                       | P10/L163-164    |
| Discount rate                                    | 10             | Report the discount rate(s) and reason chosen.                                                                                                  | P6/L123-114     |
| Selection of outcomes                            | 11             | Describe what outcomes were used as the measure(s) of benefit(s) and harm(s)                                                                    | P7/L130-132     |
| Measurement of outcomes                          | 12             | Describe how outcomes used to capture benefit(s) and harm(s) were measured.                                                                     | P8/Table 1      |
| Valuation of outcomes                            | 13             | Describe the population and methods used to measure and value outcomes.                                                                         | P9/L153-154     |
| Measurement and valuation of resources and costs | 14             | Describe how costs were valued.                                                                                                                 | P9-10/L155-158  |
| Currency, price date, and conversion             | 15             | Report the dates of the estimated resource quantities and unit costs, plus the currency and year of conversion.                                 | P10/L163-166    |
| Rationale and description of model               | 16             | If modelling is used, describe in detail and why used. Report if the model is publicly available and where it can be accessed.                  | P7/L126-131     |
| Analytics and assumptions                        | 17             | Describe any methods for analysing or statistically transforming data, any extrapolation methods, and approaches for validating any model used. | P11/L171-177    |
| Characterizing heterogeneity                     | 18             | Describe any methods used for estimating how the results of the study vary for subgroups.                                                       | P11/L179-181    |
| Characterizing distributional effects            | 19             | Describe how impacts are distributed across different individuals or adjustments made to reflect priority                                       | Not applicable  |

|                                                                       |    |                                                                                                                                                                               |                |
|-----------------------------------------------------------------------|----|-------------------------------------------------------------------------------------------------------------------------------------------------------------------------------|----------------|
|                                                                       |    | populations.                                                                                                                                                                  |                |
| Characterizing uncertainty                                            | 20 | Describe methods to characterise any sources of uncertainty in the analysis.                                                                                                  | P11/L179-181   |
| Approach to engagement with patients and others affected by the study | 21 | Describe any approaches to engage patients or service recipients, the general public, communities, or stakeholders (such as clinicians or payers) in the design of the study. | Not applicable |
| <b>Results</b>                                                        |    |                                                                                                                                                                               |                |
| Study parameters                                                      | 22 | Report all analytic inputs (such as values, ranges, references) including uncertainty or distributional assumptions.                                                          | P10/L195-205   |
| Summary of main results                                               | 23 | Report the mean values for the main categories of costs and outcomes of interest and summarise them in the most appropriate overall measure.                                  | P11/L185-232   |
| Effect of uncertainty                                                 | 24 | Describe how uncertainty about analytic judgments, inputs, or projections affect findings. Report the effect of choice of discount rate and time horizon, if applicable.      | P14/L198-206   |
| Effect of engagement with patients and others affected by the study   | 25 | Report on any difference patient/service recipient, general public, community, or stakeholder involvement made to the approach or findings of the study.                      | Not applicable |
| <b>Discussion</b>                                                     |    |                                                                                                                                                                               |                |
| Study findings, limitations, generalizability, and current knowledge  | 26 | Report key findings, limitations, ethical or equity considerations not captured, and how these could affect patients, policy, or practice.                                    | P16/L328-351   |
| <b>Other</b>                                                          |    |                                                                                                                                                                               |                |
| Source of funding                                                     | 27 | Describe how the study was funded and any role of the funder in the identification, design, conduct, and reporting of the analysis                                            | P18/L371-372   |
| Conflicts of interest                                                 | 28 | Report authors conflicts of interest according to journal or International Committee of Medical Journal Editors requirements.                                                 | P18/L374-375   |

---

*Reference:*

1. Husereau D, Drummond M, Augustovski F, de Bekker-Grob E, Briggs AH, Carswell C, et al. Consolidated Health Economic Evaluation Reporting Standards 2022 (CHEERS 2022) Statement: Updated Reporting Guidance for Health Economic Evaluations. *Value Health*. 2022;25(1):3-9.

**Table S2.** Treatment Strategy.

| <b>Treatment Strategy</b> | <b>Dose</b>                                         | <b>Time</b>                                                        |
|---------------------------|-----------------------------------------------------|--------------------------------------------------------------------|
| Nivolumab-AVD             | Nivolumab, 240 mg (adults); 3 mg/kg (children)      | Administered intravenously chemotherapy every 4 weeks for 6 cycles |
|                           | Doxorubicin, 25 mg/m <sup>2</sup>                   |                                                                    |
|                           | Vinblastine, 6 mg/m <sup>2</sup>                    |                                                                    |
|                           | Dacarbazine, 375 mg/m <sup>2</sup> on days 1 and 15 |                                                                    |
| Brentuximab vedotin-AVD   | Brentuximab vedotin, 12 mg/kg                       | Administered intravenously chemotherapy every 4 weeks for 6 cycles |
|                           | Doxorubicin, 25 mg/m <sup>2</sup>                   |                                                                    |
|                           | Vinblastine, 6 mg/m <sup>2</sup>                    |                                                                    |
|                           | Dacarbazine, 375 mg/m <sup>2</sup> on days 1 and 15 |                                                                    |
| Second-line therapy       | Dexamethasone, 40 mg/m <sup>2</sup> on days 1-4     | Administered intravenously every 4 weeks                           |
|                           | Cisplatin, 100 mg/m <sup>2</sup>                    |                                                                    |
|                           | Cytarabine, 2 g/m <sup>2</sup>                      |                                                                    |

Abbreviation: AVD, doxorubicin/vinblastine/dacarbazine.

**Table S3.** Results of Subgroup Analyses.

| <b>Subgroup</b>       | <b>PFS HR (95% CI)</b> | <b>ICER, \$/QALY<sup>a</sup></b> | <b>INHB, QALYs median (range)</b> | <b>Cost-effectiveness probability of nivolumab-AVD, %</b> |
|-----------------------|------------------------|----------------------------------|-----------------------------------|-----------------------------------------------------------|
| <b>Age, years</b>     |                        |                                  |                                   |                                                           |
| 12-17                 | 0.31 (0.13-0.74)       | 92,941.669                       | 0.668                             | 59                                                        |
| 18-60                 | 0.59 (0.36-0.95)       | Dominant                         | 0.709                             | 100                                                       |
| > 60                  | 0.30 (0.12-0.72)       | 89,388.410                       | 0.665                             | 58                                                        |
| <b>IPS risk group</b> |                        |                                  |                                   |                                                           |
| 0-3                   | 0.46 (0.28-0.76)       | 236,543.100                      | 0.961                             | 60                                                        |
| 4-7                   | 0.46 (0.26-0.83)       | 236,543.100                      | 0.961                             | 60                                                        |
| <b>Stage</b>          |                        |                                  |                                   |                                                           |
| III                   | 0.45 (0.22-0.92)       | 214,179.514                      | 0.695                             | 55                                                        |
| IV                    | 0.48 (0.31-0.74)       | 299,195.340                      | 0.699                             | 57                                                        |
| <b>Symptoms</b>       |                        |                                  |                                   |                                                           |
| B                     | 0.47 (0.30-0.74)       | 264,177.536                      | 0.698                             | 59                                                        |

|   |                  |             |       |    |
|---|------------------|-------------|-------|----|
| A | 0.44 (0.22-0.86) | 195,710.276 | 0.693 | 55 |
|---|------------------|-------------|-------|----|

---

<sup>a</sup> The nivolumab-AVD versus the brentuximab vedotin-AVD.

Abbreviation: CI, confidence interval; ICER, incremental cost-effectiveness ratio; PFS HR, progression-free survival hazard ratio; QALY, quality-adjusted life-year; N-AVD, nivolumab plus doxorubicin/vinblastine/dacarbazine; BV-AVD, Brentuximab vedotin plus doxorubicin/vinblastine/dacarbazine.
